# Supplementary material for: Valorisation of 2,5-dimethylfuran over zeolite catalysts studied by on-line FTIR-MS gas phase analysis
Source: Royal Society of Chemistry journal article supplement (doi:10.1039/d1cy01312b), 2021-11-08
Supplement: d1cy01312b1.pdf [file d1cy01312b1.pdf]

Electronic Supplementary Information (ESI)  
Valorisation of 2,5-dimethylfuran over zeolite catalysts studied  
by on-line FTIR-MS gas phase analysis

Christopher Sauer<sup>‡a</sup>, Anders Lorén<sup>b</sup>, Andreas Schaefer<sup>a</sup>, and Per-Anders Carlsson<sup>\*a</sup>

<sup>a</sup>Department of Chemistry and Chemical Engineering, Chalmers University of  
Technology, SE-412 96 Gothenburg, Sweden.

<sup>b</sup>Department of Chemistry and Materials, RISE Research Institutes of Sweden, SE-501  
15 Borås, Sweden.

October 29, 2021  
sauerc@chalmers.se<sup>‡</sup>  
per-anders.carlsson@chalmers.se<sup>\*</sup>  
phone: +46 (0)31 772 2924  
fax: +46 (0)31 160 062

## Electronic Supplementary Information

The ESI contains the flow scheme of the catalytic flow reactor experiments (fig. S1). A schematic description of the catalytic flow reactor can be found in a previous work (SI).[Anal. Chem. 2021, 93, 39, 13187–13195]. The schematic description of the experimental setup during *in situ* IR experiments (DRIFTS) is shown in fig. S2.

Catalyst characterisation for the four samples H-BEA(37), Cu-ZSM-5(22), H-ZSM-5(38) and H-ZSM-5(355) was performed.  $N_2$ -isotherms are shown in fig. S4, X-ray powder diffractograms in fig. S3, chemical analyses by XRF in table S1,  $NH_3$ -TPD in fig. S5. 2,5-dimethylfuran-TPD under oxidative conditions are shown in fig. S6; here the desorbing species are "carbon equivalents" mostly in the form of CO and  $CO_2$  as shown by the continuous lines. The dashed lines include other desorbing species such as small amounts of 2,5-dmf, olefins and btx as described in the online analysis in the main article. Figure S7 shows desorbing species after 2,5-dmf-adsorption in Ar, without the presence of oxygen.

IR spectra of the product stream during online analysis for Cu-ZSM5 SAR(22) and H-ZSM5(355) and its residual (fig. S9) as well as concentration profiles of water, CO and  $CO_2$  (fig. S10) and 2-methylfuran, formaldehyde and methane fig. S11 during the step responses of zeolite exposure to 2,5-dmf are included.

Background subtracted *in situ* IR spectra of during TPD of 2,5-dmf and conversion species from different zeolites are found in figs. S13 to S15.

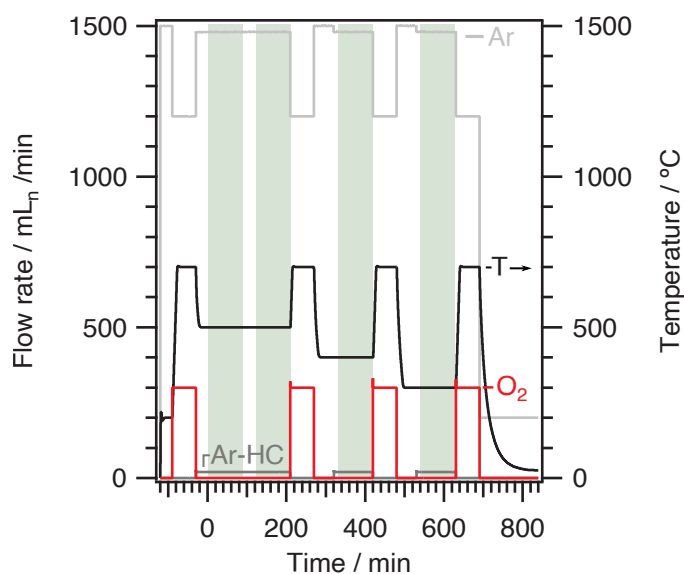

Figure S1: Flowchart of the catalytic experiments. The hydrocarbon stream (HC) of 2,5-dimethylfuran enters the catalytic reactor in 90 min durations as displayed by the solid bars. The gas flow rates are given in  $mL_n/min$  at normal conditions.

## Electronic Supplementary Information

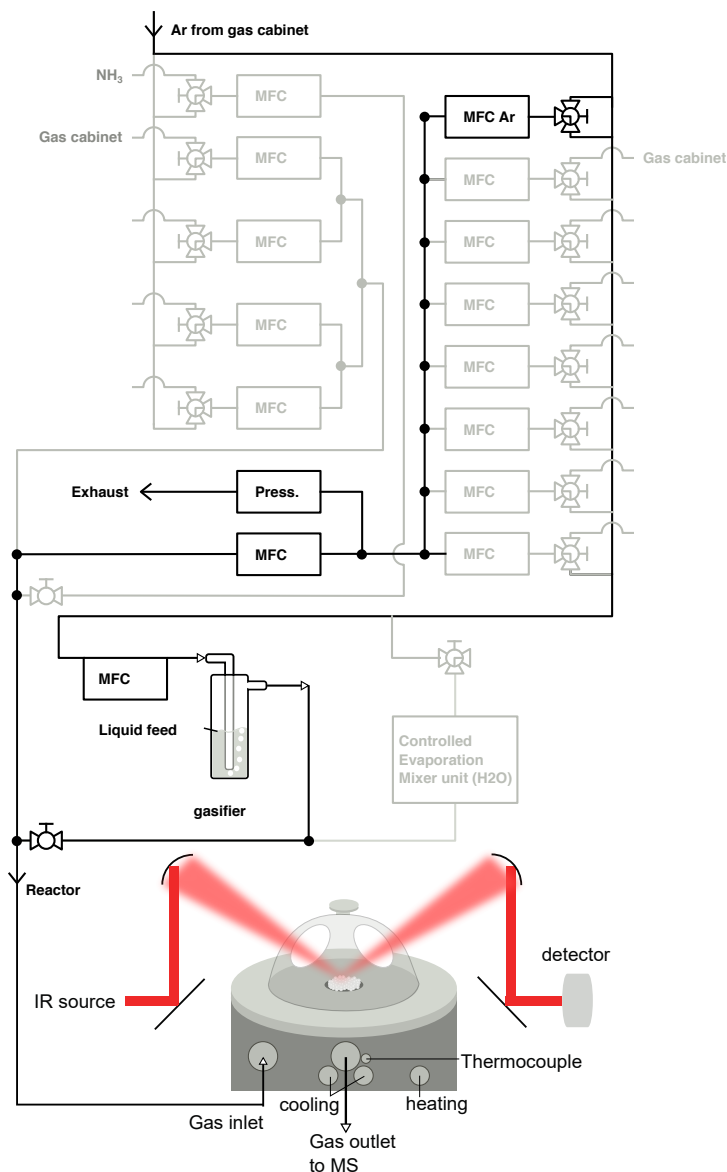

Figure S2: Instrumental setup during DRIFTS experiments. Parts that are greyed out are not used during this work. MFCs control the gas flows to a the reactor cell, which is equipped with a Praying mantis diffuse reflectance accessory and a stainless steel high-temperature reactor cell (Harrick Scientific Products Inc.) with  $\text{CaF}_2$  windows, thermocouple, heating and cooling. Its outlet is connected to the MS.

Electronic Supplementary Information

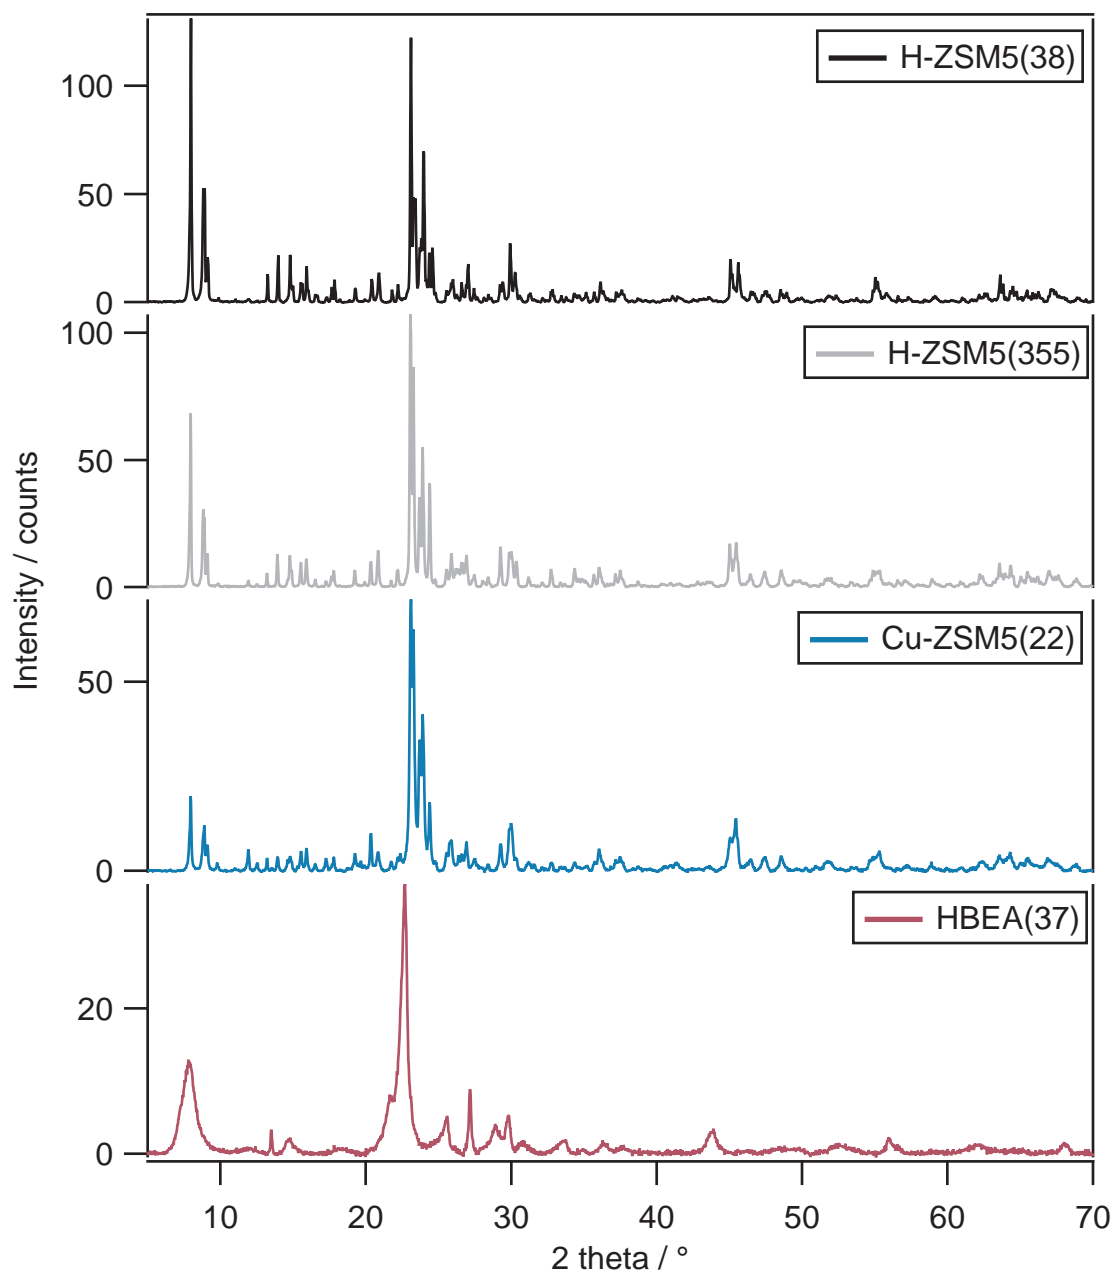

Figure S3: X-ray diffractograms for the four catalytic samples.

# Electronic Supplementary Information

Table S1: Chemical analyses by XRF

| sample       | SiO <sub>2</sub> /Al <sub>2</sub> O <sub>3</sub> | Cu<br>% | Zr  | Fe<br>/ppm | Ti  | Ca  |
|--------------|--------------------------------------------------|---------|-----|------------|-----|-----|
| H-BEA(37)    | 37                                               | -       | 250 | 580        |     |     |
| H-ZSM-5(355) | 355                                              | -       | 123 | 375        | 207 | 236 |
| H-ZSM-5(38)  | 38                                               | -       | 158 | 775        | 376 |     |
| Cu-ZSM-5(22) | 22                                               | 2.8     | 74  | 506        | 291 |     |

# Electronic Supplementary Information

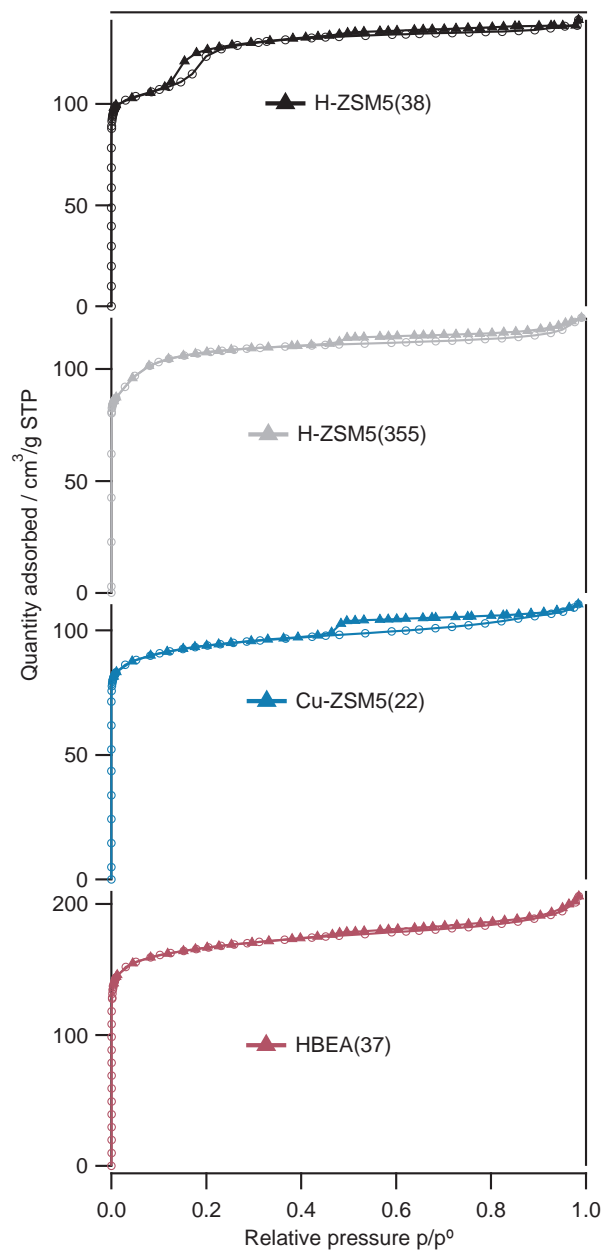

Figure S4:  $N_2$ -sorption isotherms at 77K of the four catalytic samples. Adsorption: circles; desorption: filled triangles.

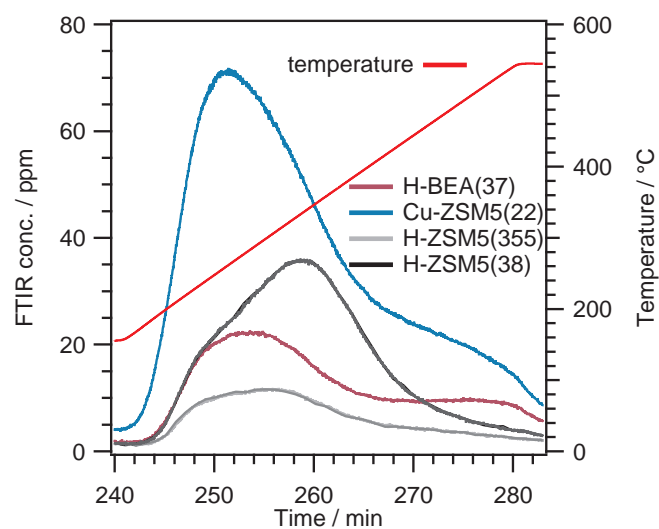

Figure S5:  $NH_3$ -TPD profiles of the four catalytic samples between 150 °C to 550 °C. Conditions: Temperature ramp 10 °C min<sup>-1</sup>, total flow 1500 mL<sub>n</sub>/min, Ar balance.

## Electronic Supplementary Information

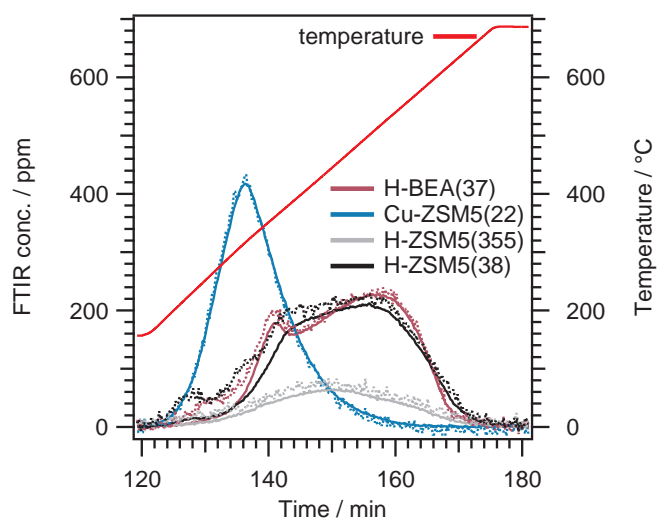

Figure S6: TPD profiles of "carbon equivalents" for the four catalytic samples between 150 °C to 700 °C. Continuous lines show the combined signal of CO and CO<sub>2</sub>, while dashed lines show the sum of all detected compounds (as in table 2 of the main article) using the online analysis. Conditions: Temperature ramp 10 °C min<sup>-1</sup>, total flow 1500 mL<sub>n</sub>/min, 20% O<sub>2</sub>, Ar balance.

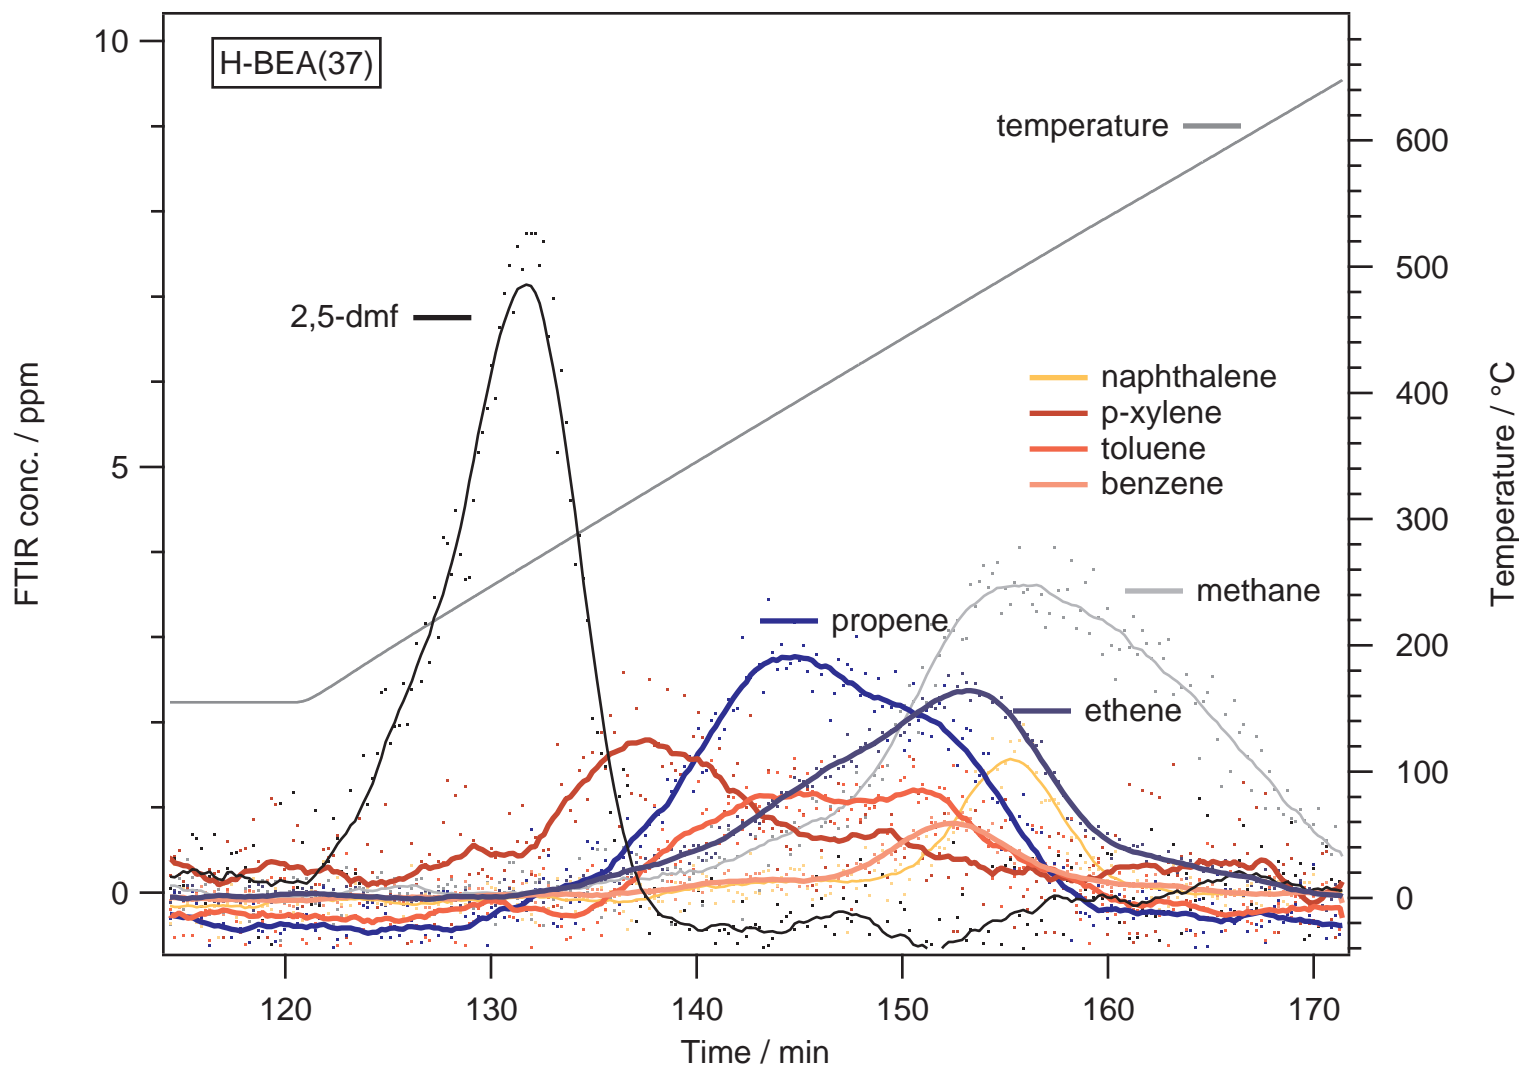

Figure S7: TPD profiles of species for the H-BEA(37) sample between 150 °C to 700 °C. Continuous lines show the smoothed signal, while dots show measured data. Conditions: Temperature ramp 10 °C min<sup>-1</sup>, total flow 1500 mL<sub>n</sub>/min, no O<sub>2</sub>, Ar balance.



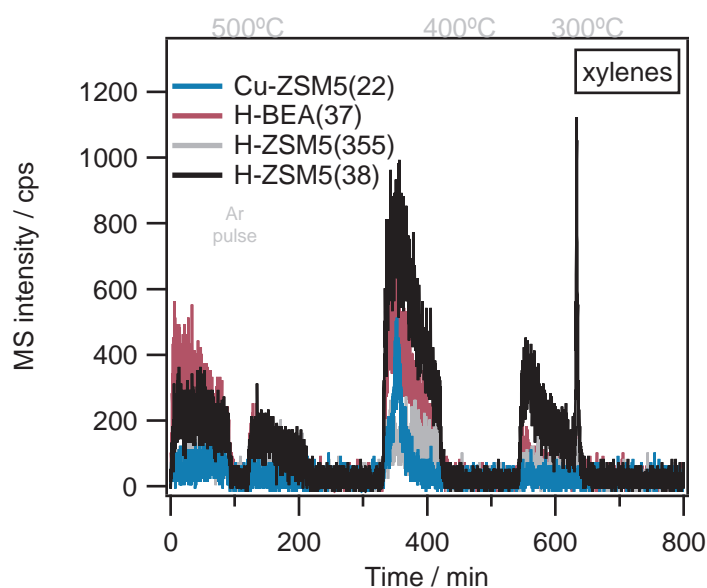

Figure S8: MS signal of xylenes ( $m/z = 106$ ) during 2,5-dmf step response measurements over zeolite catalysts at temperatures 500 °C, 400 °C and 300 °C

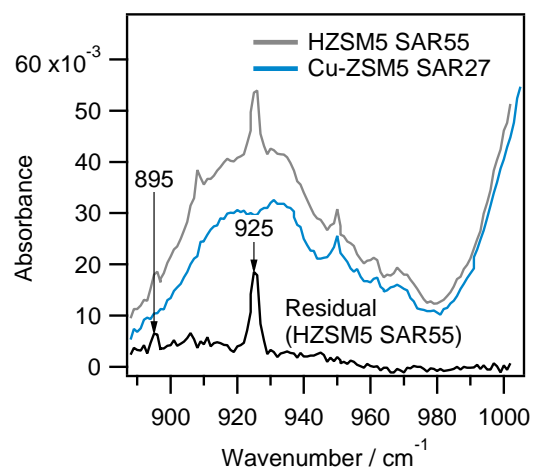

Figure S9: Infrared spectrum of the gaseous product stream during the online analysis for samples H-ZSM-5(355) and Cu-ZSM-5(22). The residual after analysis for H-ZSM-5(355) shows unidentified species with bands at 895  $\text{cm}^{-1}$  and 926  $\text{cm}^{-1}$ , that are not observed for the Cu-sample.

# Electronic Supplementary Information

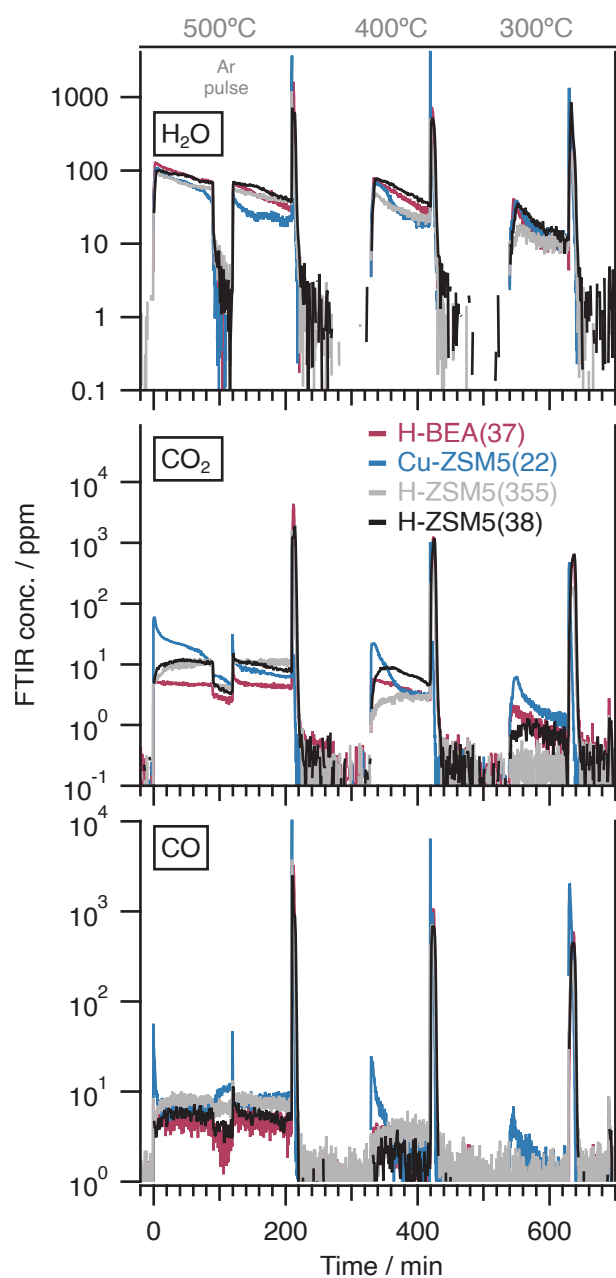

Figure S10: Concentration profiles of water, CO and  $\text{CO}_2$  as determined by online FTIR during 2,5-dmf step response measurements over zeolite catalysts at temperatures 500 °C, 400 °C and 300 °C .

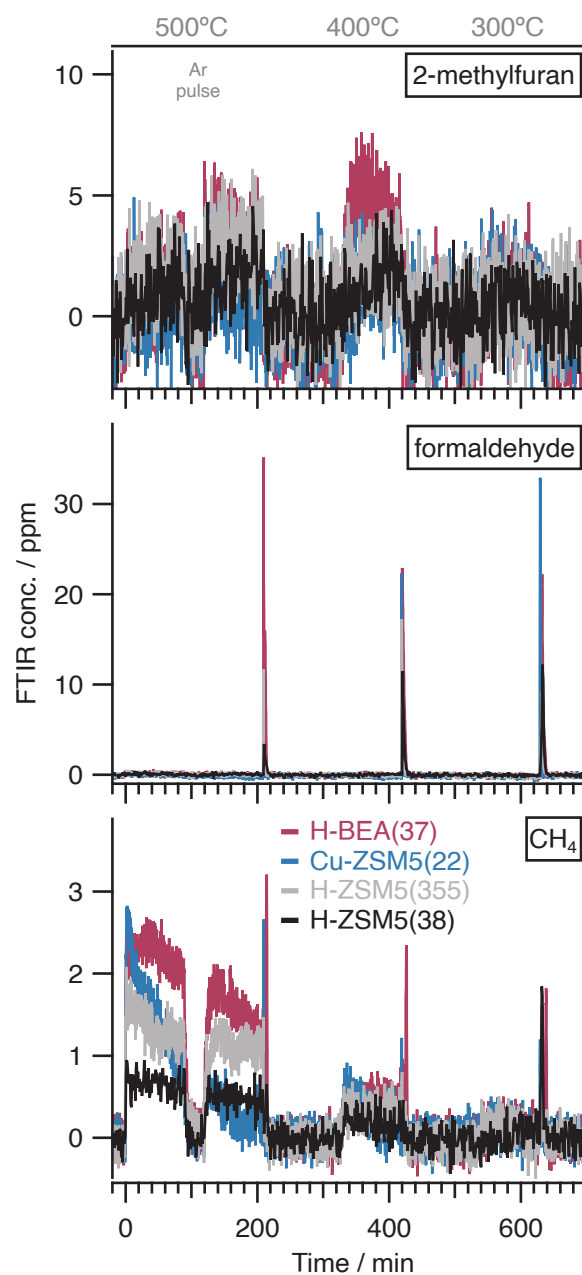

Figure S11: Concentration profiles of 2-methylfuran, formaldehyde and methane as determined by online FTIR during 2,5-dmf step response measurements over zeolite catalysts at temperatures 500 °C, 400 °C and 300 °C .

# Electronic Supplementary Information

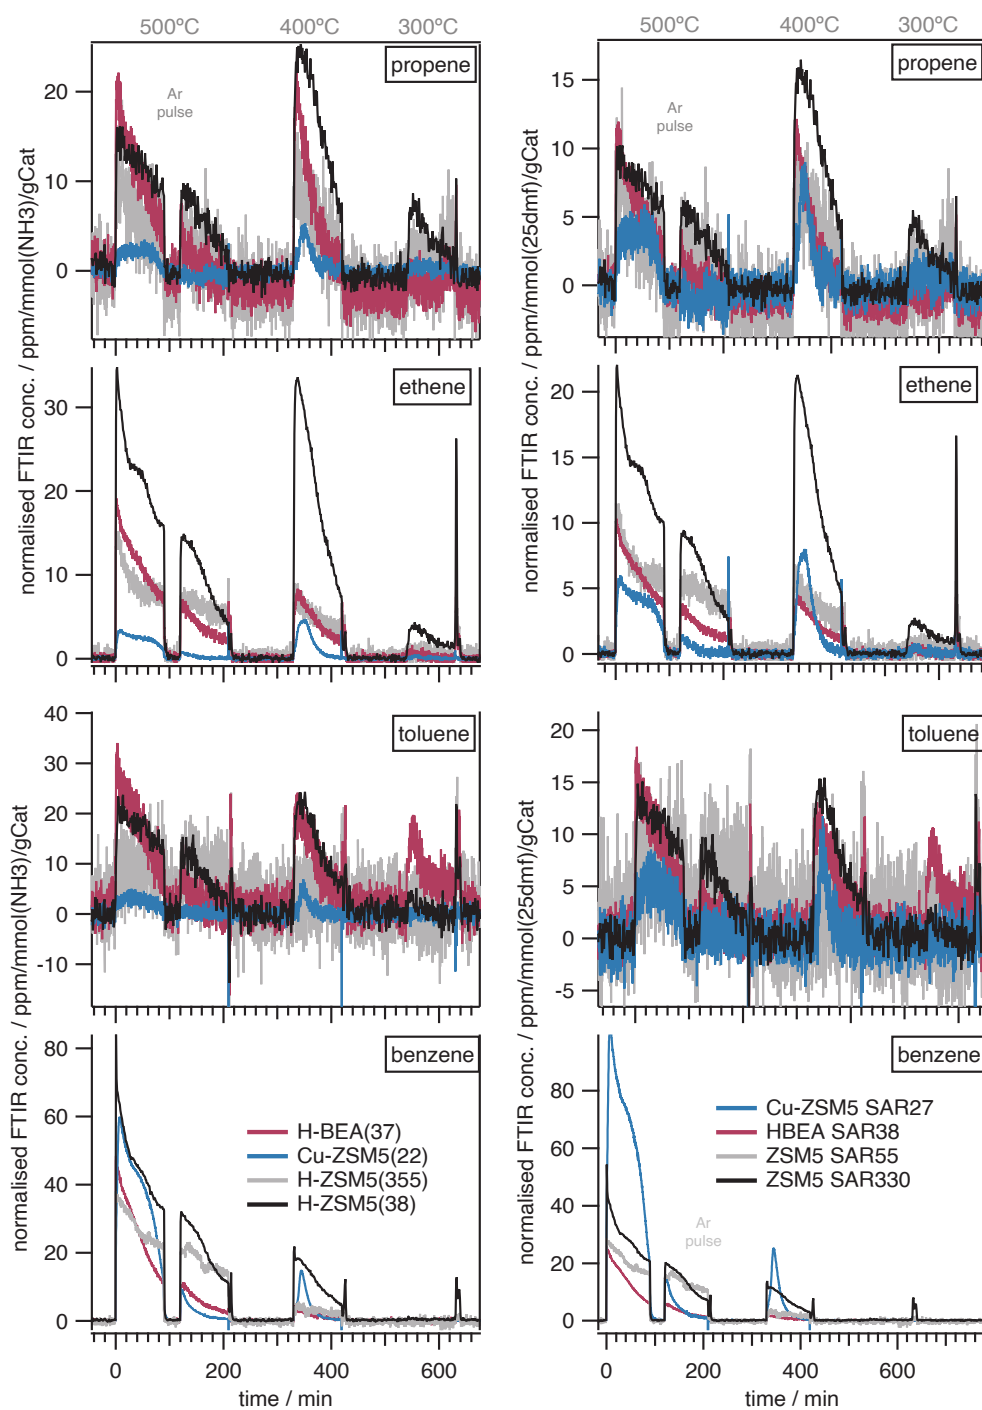

Figure S12: FTIR signal normalised to the amount of acid sites determined by NH<sub>3</sub> (left) and 2,5-dimethylfuran adsorption sites (right) for ethene, propene, toluene and benzene.

Electronic Supplementary Information

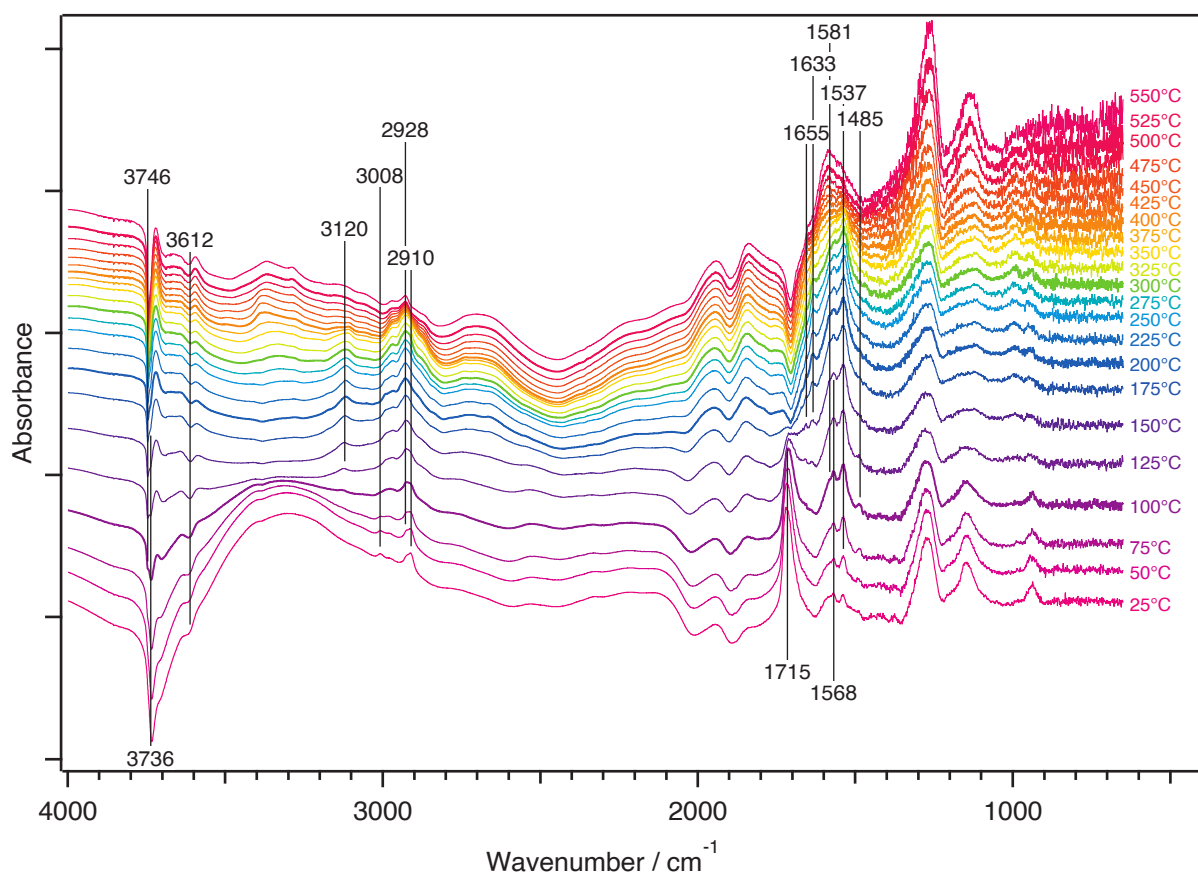

Figure S13: Background subtracted *in situ* IR spectra of TPD of 2,5-dmf and H-BEA(37).

Electronic Supplementary Information

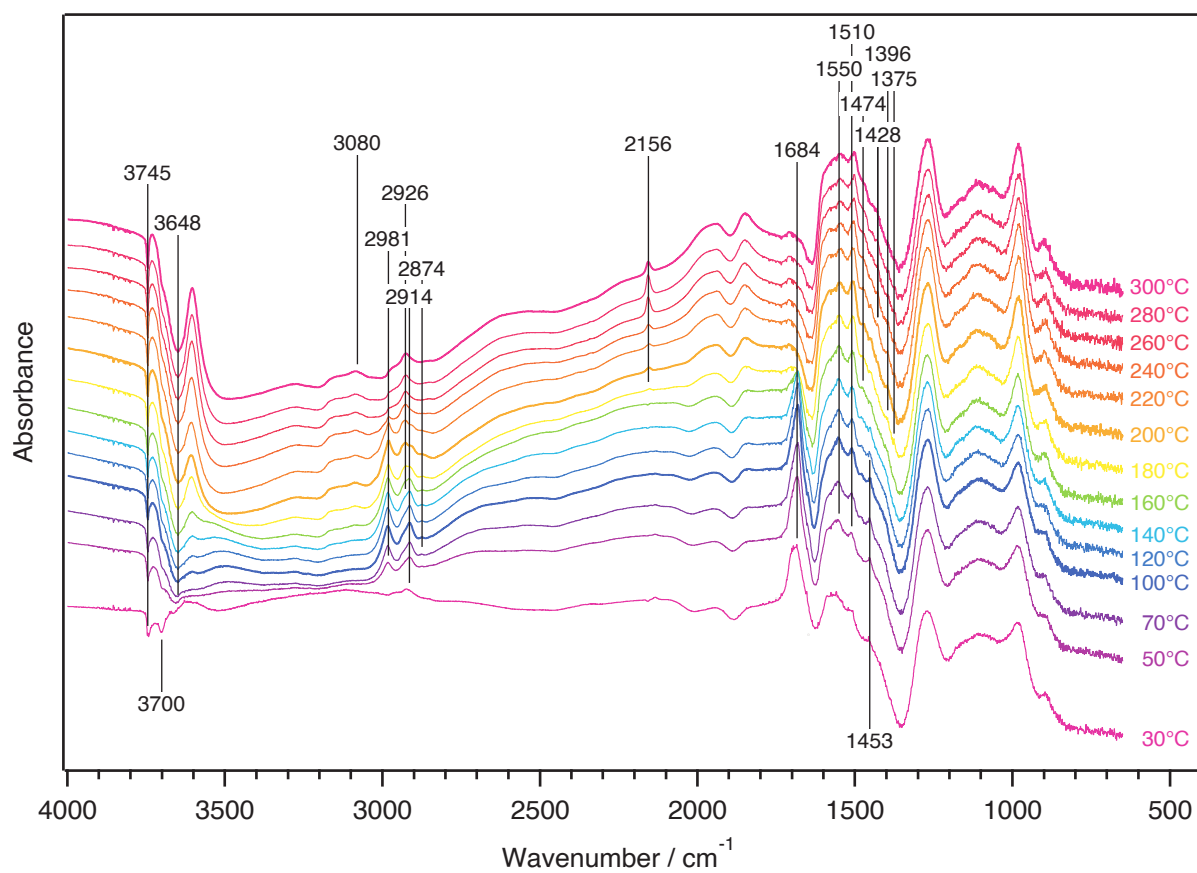

Figure S14: Background subtracted *in situ* IR spectra of TPD of 2,5-dmf and Cu-ZSM-5(22).

Electronic Supplementary Information

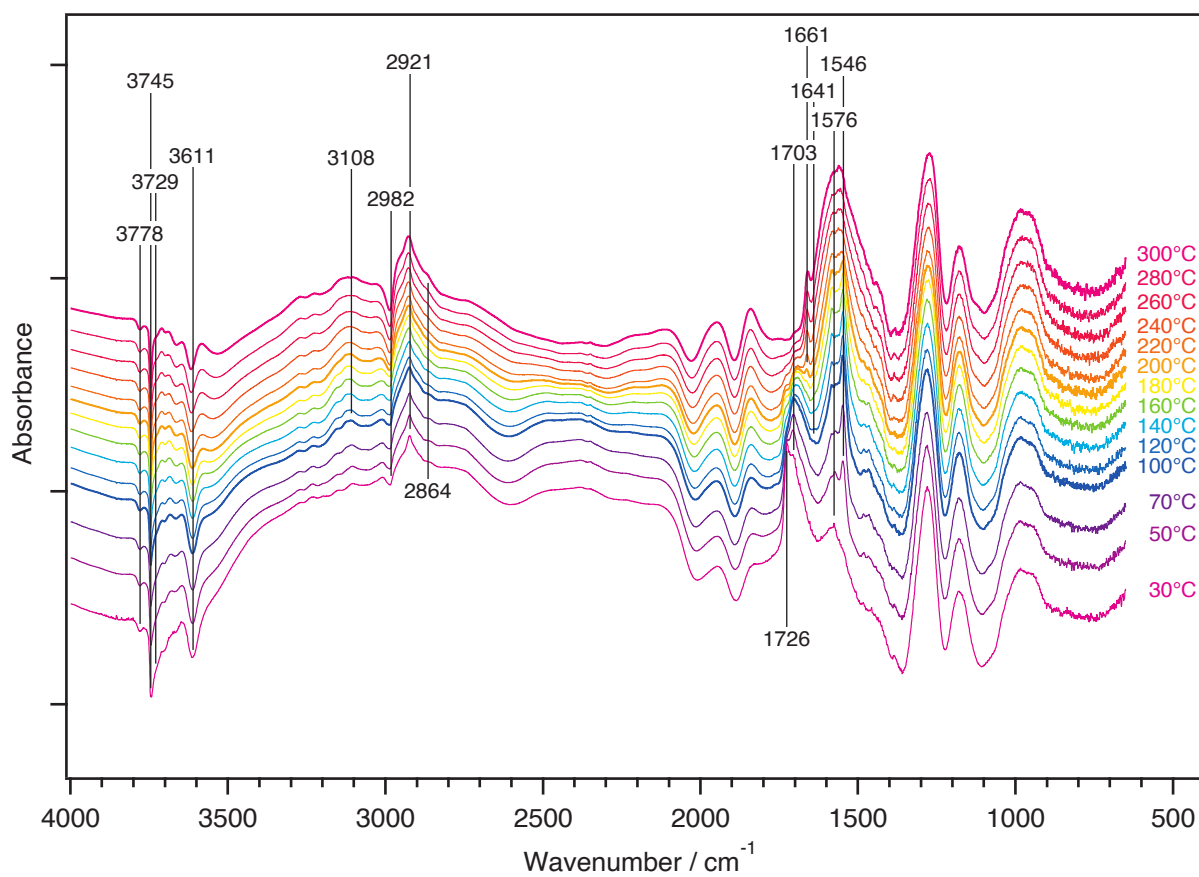

Figure S15: Background subtracted *in situ* IR spectra of TPD of 2,5-dmf and H-ZSM-5(22).
